# Supplementary material for: A stable and long-lasting concentration cell based on a reduced graphene oxide membrane and natural resource electrolyte
Source: Royal Society of Chemistry journal article supplement (doi:10.1039/c7ta05447e), 2017-01-01
Supplement: c7ta05447e1.pdf [file c7ta05447e1.pdf]

## **Supporting information**

### **A stable and long-lasting concentration cell based on reduced graphene oxide membrane and natural resource electrolyte**

Yi He <sup>a, b</sup>, Zhe Wang <sup>a</sup>, Jing Zhang <sup>a</sup> and Lei Wei <sup>a\*</sup>

<sup>a</sup> School of Electrical and Electronic Engineering, Nanyang Technological University,  
50 Nanyang Avenue, 639798, Singapore

<sup>b</sup> School of National Defence Science & Technology, Southwest University of Science  
and Technology, Mianyang 621010, P. R. China

## **Experimental Methods**

**Chemicals.** Graphite powder (< 20  $\mu\text{m}$ ), hydriodic acid (57 wt. % in  $\text{H}_2\text{O}$ ), and humic acid were purchased from Sigma-Aldrich. Potassium chloride, potassium nitrate, and sodium citrate were purchased from Alfa Aesar. The chemicals were used as received. All the solutions were prepared with deionized water.

**Preparation of reduced graphene oxide membrane (RGOM).** Before preparation of RGOM, graphene oxide (GO) dispersion was pre-synthesized from an improved modified Hummers method<sup>S1</sup>. Then 80 mL GO dispersion with a concentration of 0.9 mg/mL was added into a glass petri dish and dried at 50 °C in oven for 24 hours. Thus, graphene oxide membrane (GOM) was formed at the bottom of the glass petri dish. After that, 10 mL HI (57 wt. %) was added into glass petri dish and submerge the GOM. HI and GOM were sealed in the glass petri dish heated to 100 °C in oven for 1 hour to make sure the GOM was completely reduced to RGOM. The resultant RGOM was easily peeled off after washed with deionized water and dried at 80 °C in oven.

**Characterization.** The thickness of graphene oxide was measured by atomic force microscopy (AFM Cypher ES, Asylum Research). The thickness of RGOM was determined by cross-section SEM (SM-7600F). X-ray powder patterns were obtained by a Shimadzu XRD-6000 X-ray powder diffractometer with  $\text{Cu K}_\alpha$  radiation. X-ray photoelectron spectroscopy spectra were recorded with ESCALAB 250 photoelectron spectrometer with  $\text{Al K}_\alpha$ . Fourier transform infrared spectroscopy was carried out on IRPrestige-21 spectrometer (Shimadzu). Cyclic voltammogram curves were obtained

with a CHI660E electrochemical station. The voltage and current were collected with a Keithley 6517 electrometer.

S1 J. Chen, Y. Li, L. Huang, C. Li and G. Shi, *Carbon*, 2015, **81**, 826.

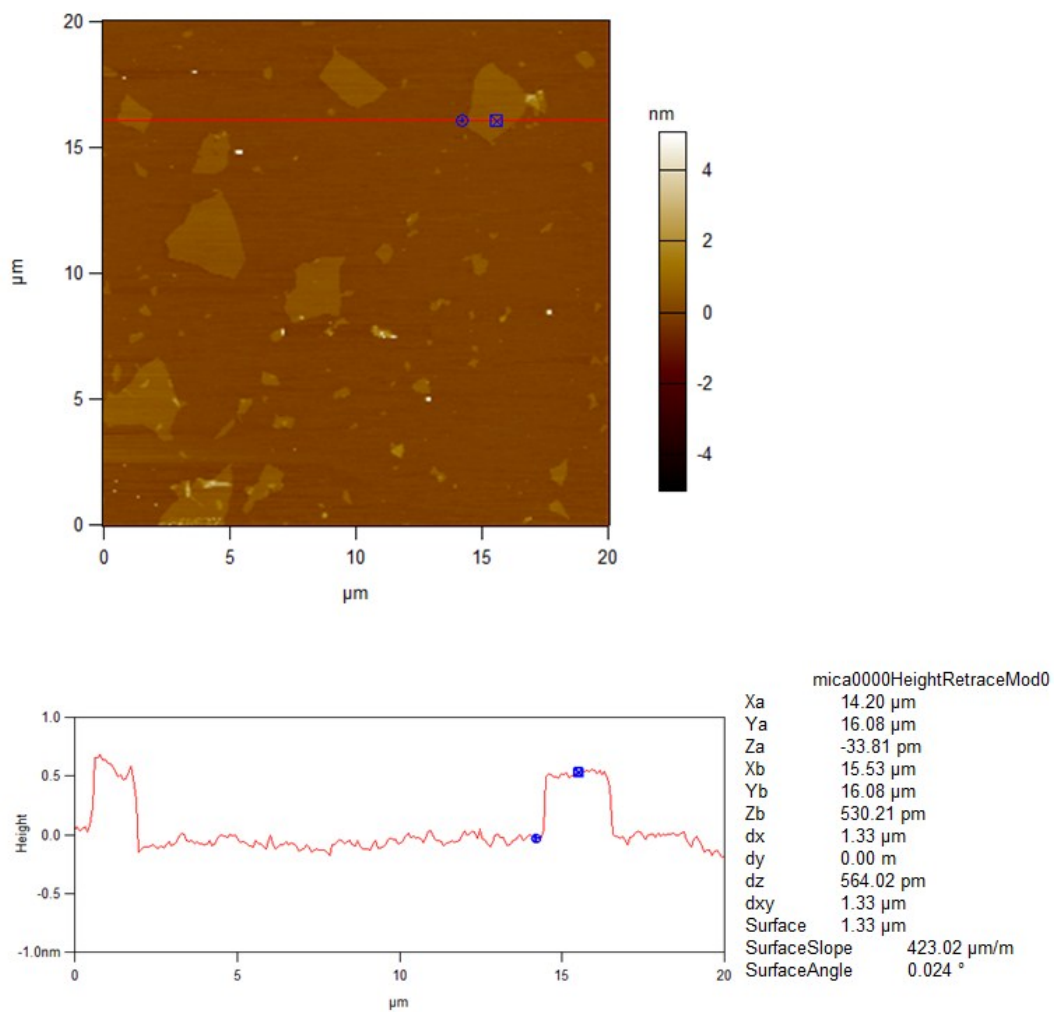

**Fig. S1** AFM image of the GO dispersion.

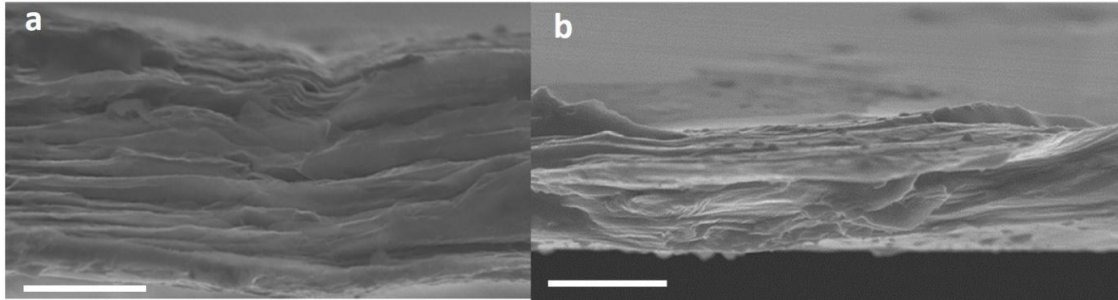

**Fig. S2** Cross-sectional SEM images of RGOM with different thicknesses: a) 4  $\mu\text{m}$ , b) 2  $\mu\text{m}$  ), scale bar: 2  $\mu\text{m}$ .

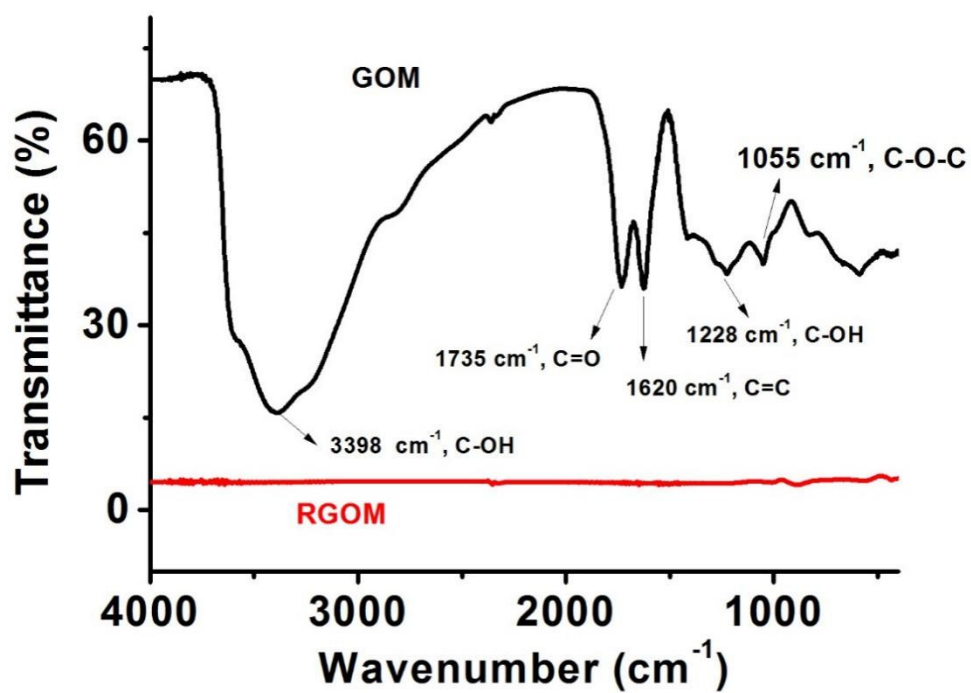

Fig. S3 FT-IR spectra of GOM and RGOM.

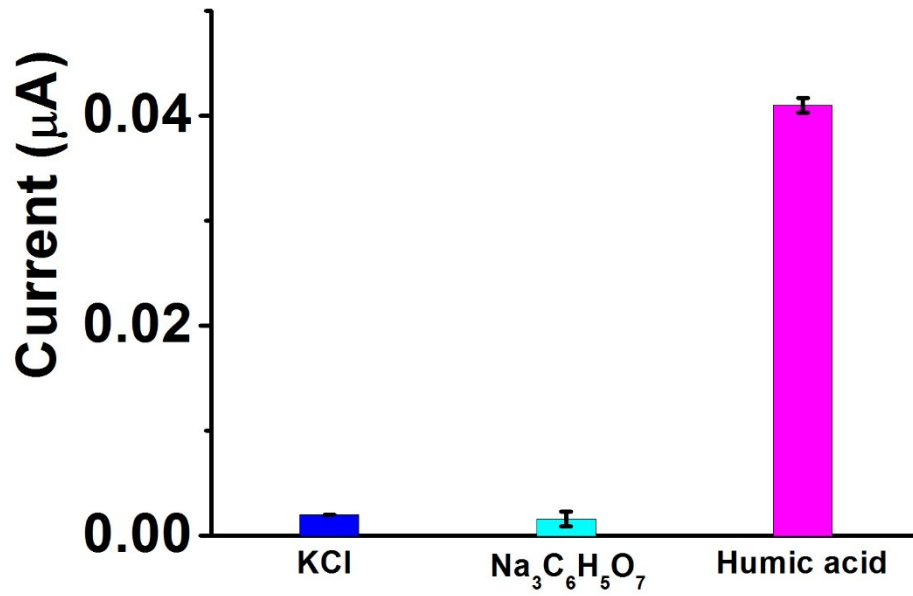

**Fig. S4** Comparison of the short-circuit current of the concentration cell using different electrolytes including KCl, sodium citrate ( $\text{Na}_3\text{C}_6\text{H}_5\text{O}_7$ ), and HA at a concentration of 1 mg/mL.

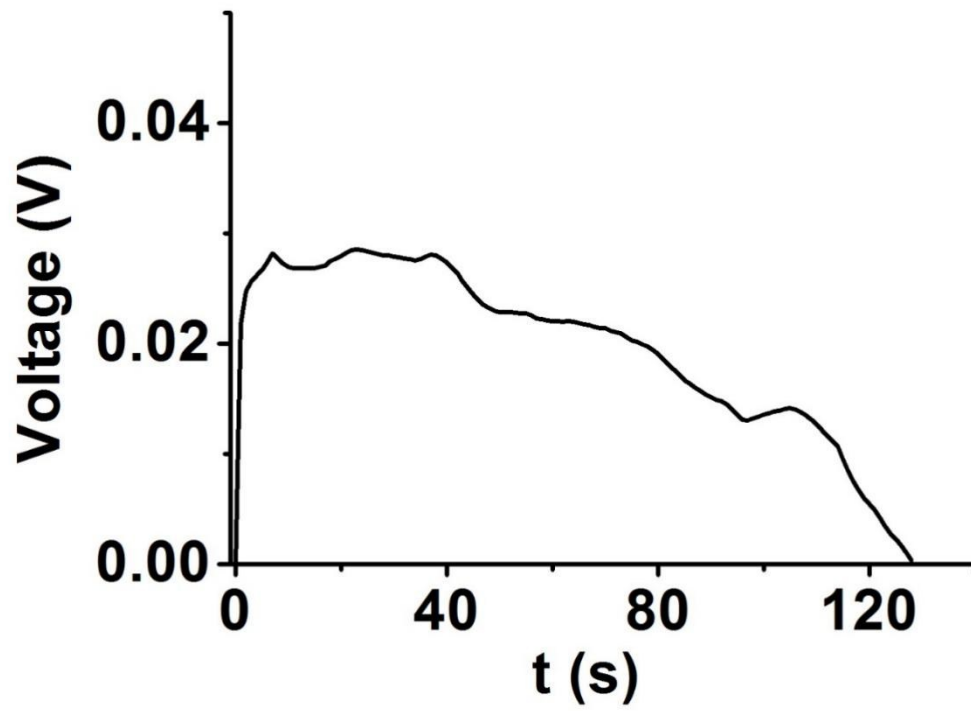

**Fig. S5** Open-circuit voltage as a function of time for the concentration cell using 1 mg/mL KCl as the electrolyte.



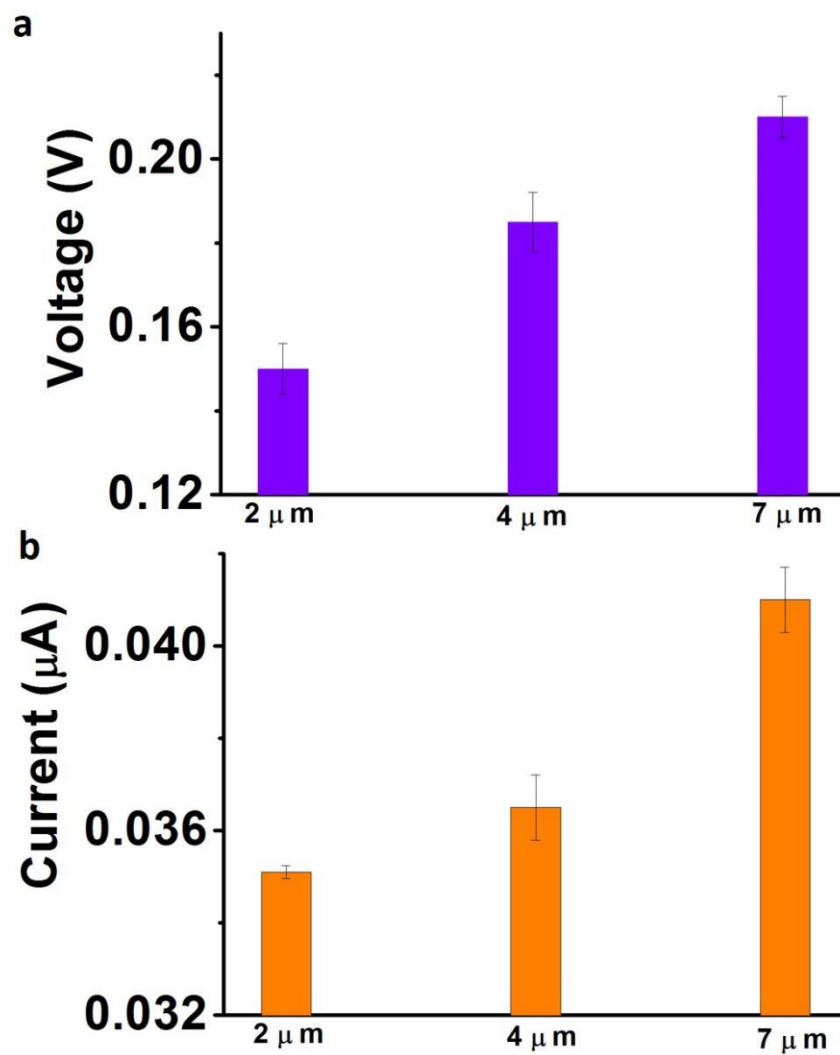

**Fig. S6** Effect of the thickness of RGOM on the (a) open-circuit voltage and (b) short-circuit current of the concentration cell.

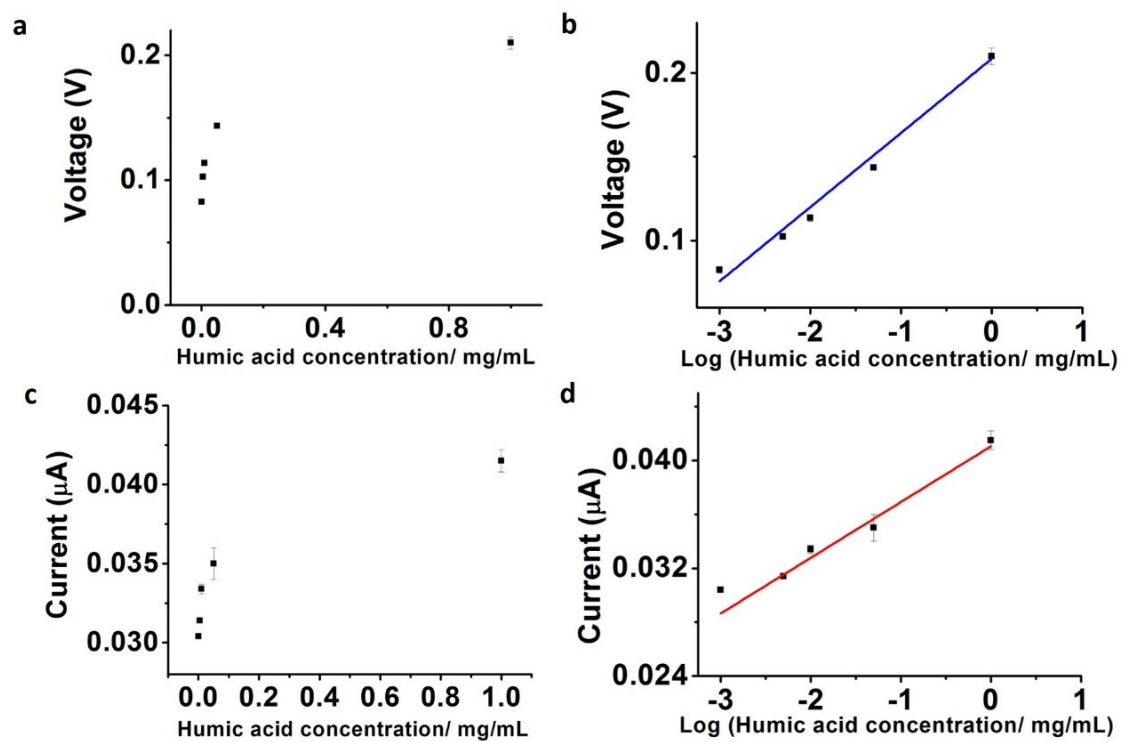

**Fig. S7** Effect of the concentration of HA solution on the (a, b) open-circuit voltage and (c, d) short-circuit current of the concentration cell. The solid lines of c and d represent the linear fitting to equation.

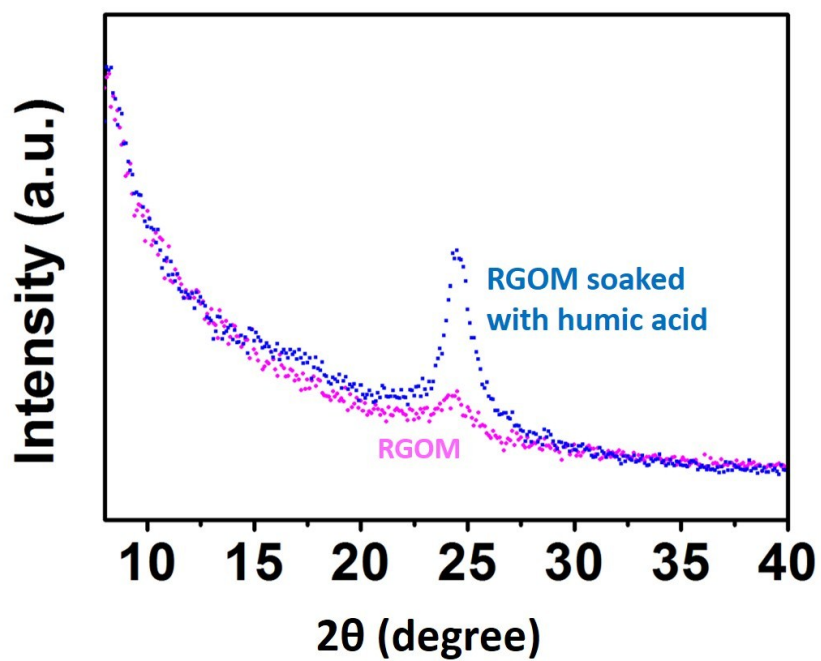

**Fig. S8** XRD patterns of RGOM before (pink dots) and after (blue dots) soaking with 1 mg/mL HA solution for four days.

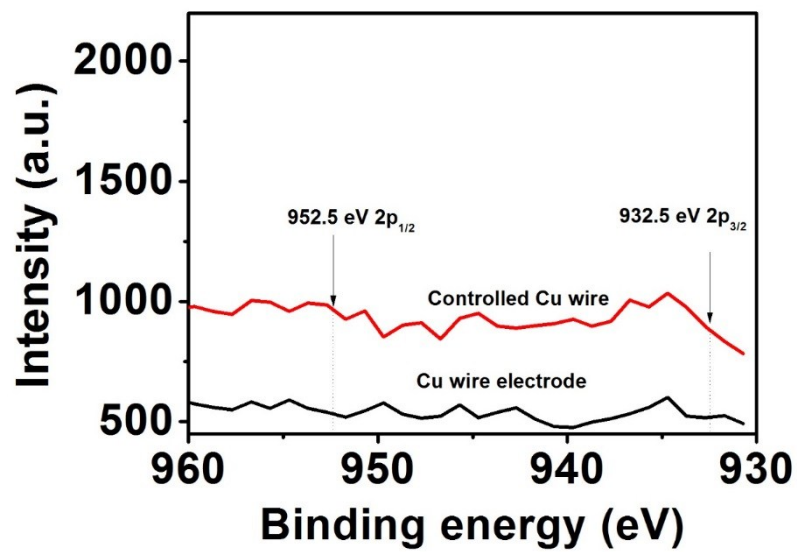

**Fig. S9** X-Ray photoelectron spectra of the Cu 2p for controlled Cu wire and Cu wire electrode samples.
